# Supplementary material
Source: PubMed Central journal article supplement (PMC2777922)

**The low affinity receptor for neurotrophins p75<sup>NTR</sup> plays a key role for satellite cell function in muscle repair acting via RhoA**

Daniela Deponti\*, Roberta Buono†, Giuseppina Catanzaro†, Clara De Palma‡, Renato Longhi§, Raffaella Meneveri||, Nereo Bresolin\*,¶, Maria Teresa Bassi\*, Giulio Cossu†,#, Emilio Clementi\*,‡@, Silvia Brunelli†,||@

\*E. Medea Scientific Institute, 23842 Bosisio Parini, Italy; †Division of Regenerative Medicine, San Raffaele Scientific Institute, 20132 Milan, Italy; ‡Dept. of Preclinical Sciences, LITA-Vialba, University of Milano, 20157 Milan, Italy; §Istituto di Chimica del Riconoscimento Molecolare, Consiglio Nazionale delle Ricerche, ||Dept. of Experimental Medicine, University of Milano-Bicocca, 20052 Monza, Italy; ¶Dept. of Neurological Sciences, University of Milano, 20129 Milan, Italy #Dept. of Biology, University of Milano, 20130 Milan, Italy.

@Corresponding authors

## Supplementary Figure Legends

### Suppl. Fig.1

#### *The blockade of NGF signalling does not affect muscle differentiation*

Densitometric analysis on the western blot shown in Figure 2A. Primary satellite cells-derived myogenic precursors were constantly treated with NGF and the blocking peptide; after 12 hours of differentiation the expression of sarcomeric myosin, myogenin and PCNA was tested by western blot. The expression levels of the myogenic markers are normalized on the expression levels of the housekeeping protein GAPDH.

### Suppl Fig. 2

#### *$\alpha$ -actinin organization is regulated by NGF signalling*

Myotubes treated for 12 hours with or without (NT) p75<sup>NTR</sup> blocking antibody (anti-p75), the antagonist peptide or LPA were stained for myosin (red) and for  $\alpha$ -actinin (green). Scale bare 100  $\mu$ m.

### Suppl. Fig. 3

#### *Paxillin organization is regulated by NGF signalling*

Myotubes treated for 12 hours with or without (NT) p75<sup>NTR</sup> blocking antibody (anti-p75), the antagonist peptide or LPA were stained for sarcomeric myosin (red) and for paxillin (green). Scale bare 100  $\mu$ m.

### Suppl. Fig. 4

#### *FAK organization is regulated by NGF signalling*

Myotubes treated for 12 hours with or without (NT) p75<sup>NTR</sup> blocking antibody (anti-p75), the antagonist peptide or LPA were stained for sarcomeric myosin (red) and for FAK (green). Scale bare 100  $\mu$ m.

### Suppl. Fig. 5

#### *Fusion and cytoskeleton disregulation are reverted by inhibiting RhoA activation*

A-B) Satellite cells-derived myogenic precursors were constantly treated in the presence or absence of the p75<sup>NTR</sup> blocking antibody (p75 Ab), or the blocking peptide, in presence or absence of exoenzyme C3; after 12 hours in differentiating medium they were fixed and immunostained for sarcomeric myosin (A) in order to calculate the fusion index (B). In (B) the graph on the left shows the total fusion index, the graph on the right the percentage of syncytia with 1, 2-6, or >6 myonuclei, in the different culture conditions.

Scale bar 50  $\mu\text{m}$ . Error bars indicate s.e.m. Triple asterisk  $P < 0.01$  vs untreated myoblasts, double and triple single cross  $P > 0.01$  or  $P < 0.05$  vs treated myoblasts in absence of C3.

C) Satellite cells-derived myogenic precursors were treated after 12 hours in differentiating medium with or without (NT) the p75<sup>NTR</sup> blocking antibody (p75 Ab), the competing peptide or LPA, in presence or absence of C3 ; after additional 12h of treatment they were fixed and immunostained for myosin heavy chain. Scale bare 50  $\mu\text{m}$ .

Suppl. Fig.6

*RhoA signalling participates to skeletal muscle regeneration in vivo*

A) Anterior tibialis sections from 6 different animals (3 mock transfected controls and three pEGFP-RHOV14 transfected). Sections were stained for  $\beta$ -gal activity and laminin (black) in order to compare the fusion efficiency of pEGFP and pEGFP-RHOV14 transfected myoblasts. B) Quantification for 12 animals (6 mock transfected and 6 pEGFP-RHOV14 transfected) is reported in the bar graph. Numbers refer to the single animals including those for which images of the sections are shown.

Scale bare 100  $\mu\text{m}$ .

# Supplementary Figure 1

## MYOSIN

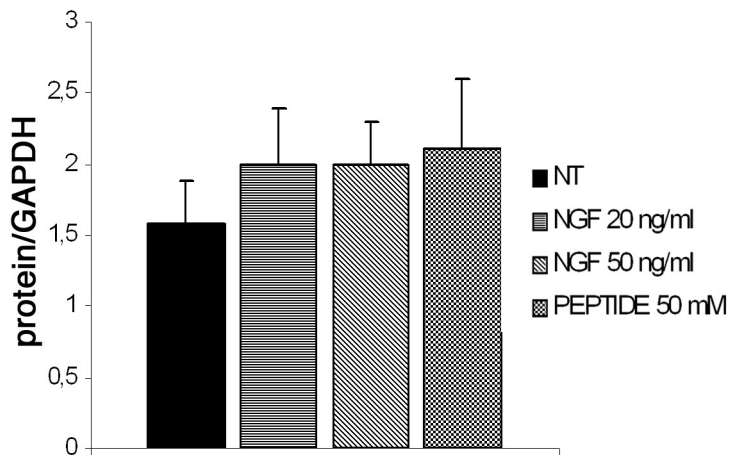

## MYOGENIN

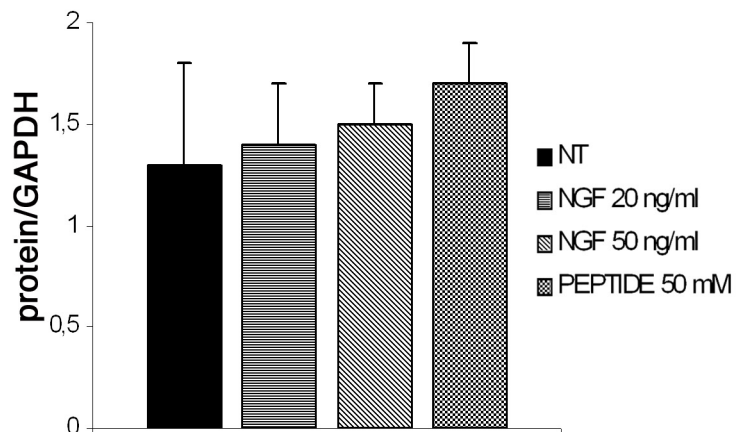

## PCNA

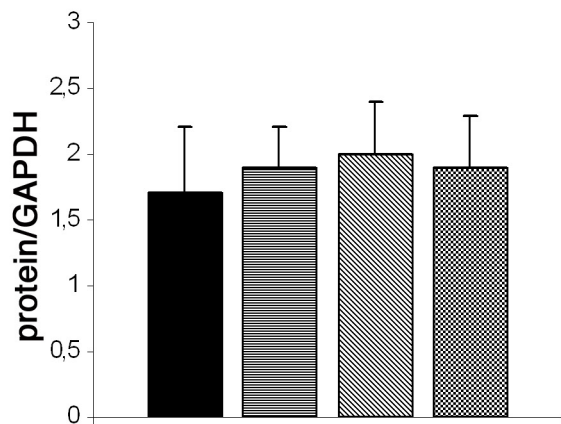

# Supplementary Figure 2

$\alpha$ -actinin

NT

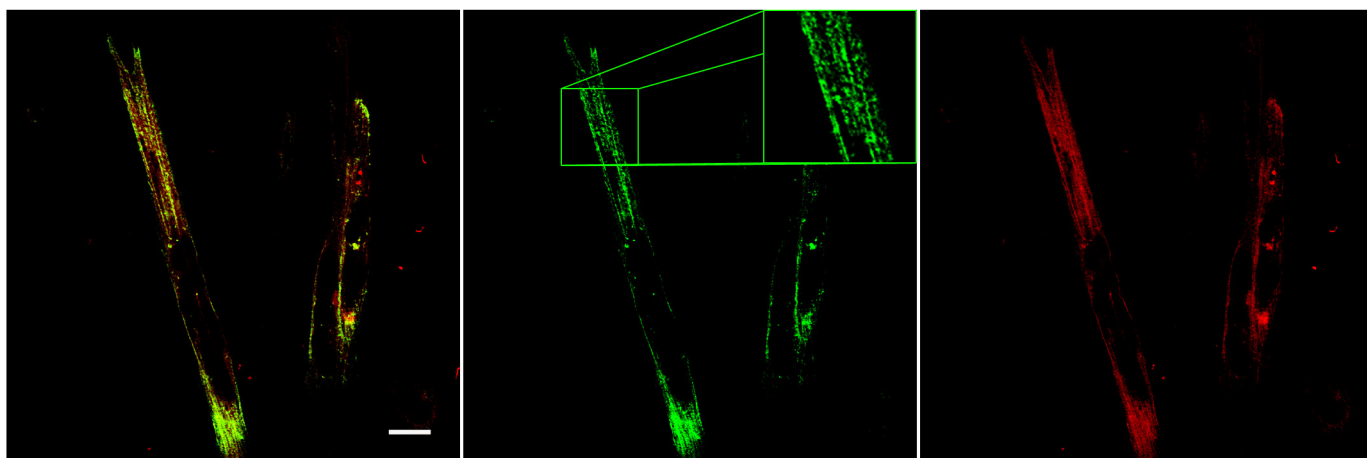

anti-p75

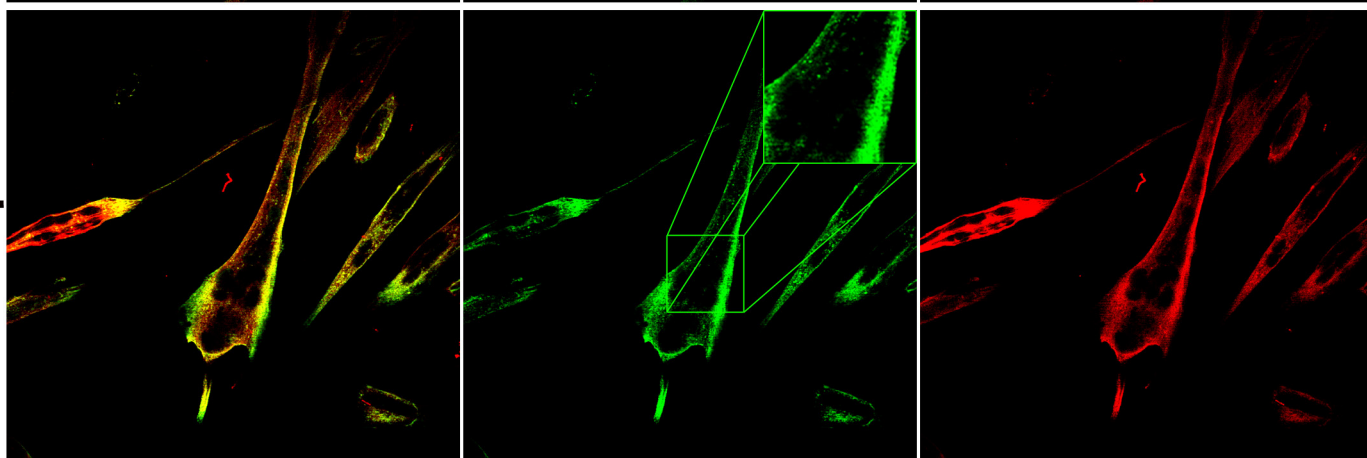

peptide

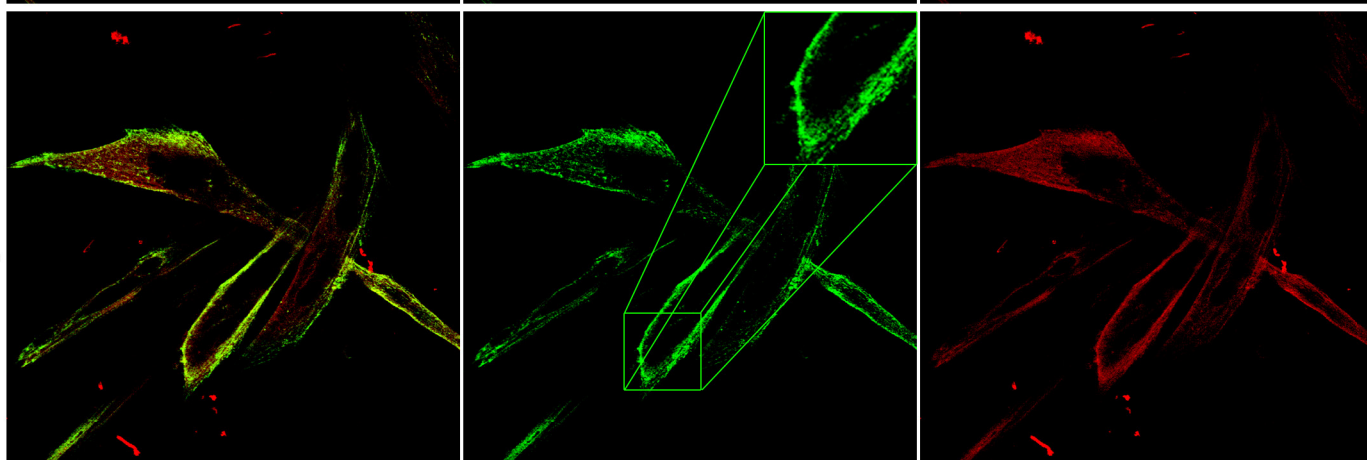

LPA

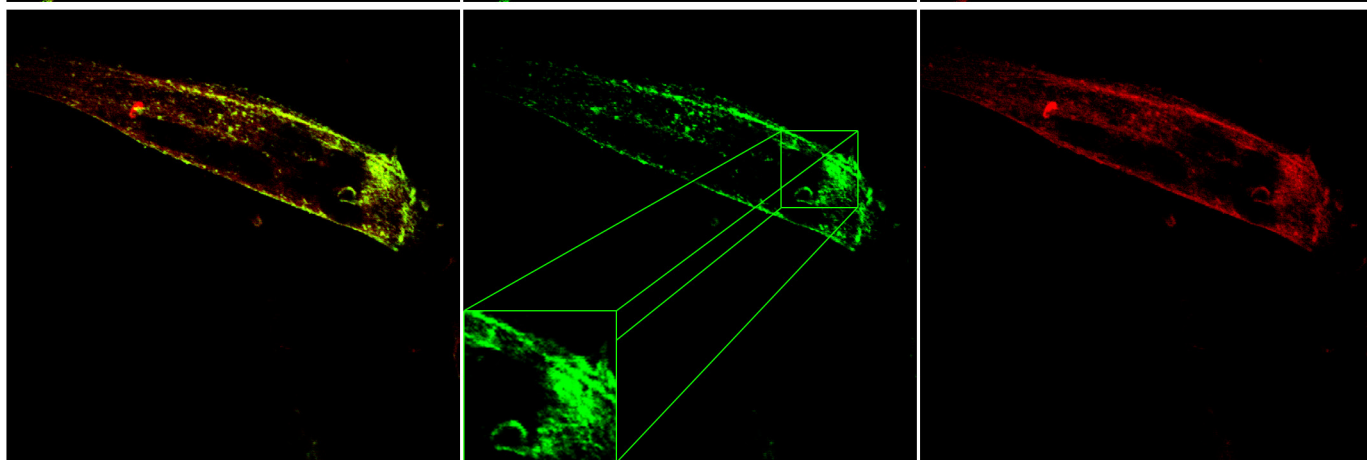

# Supplementary Figure 3

## PAXILLIN

NT

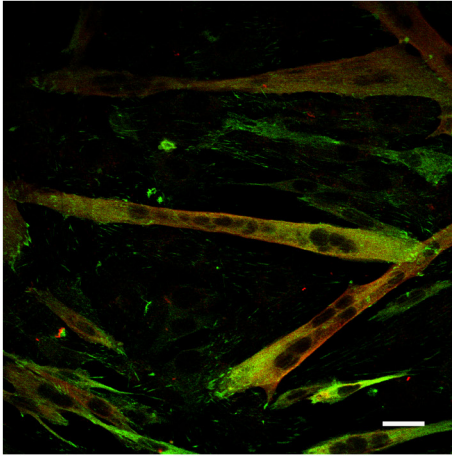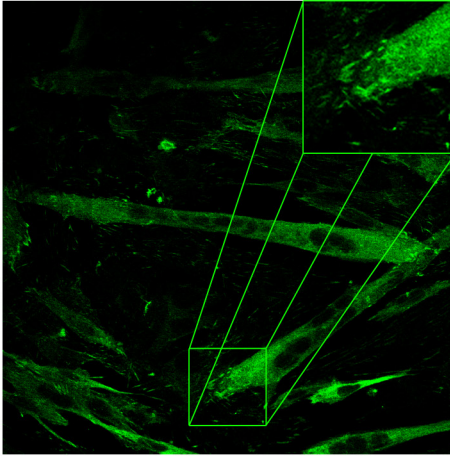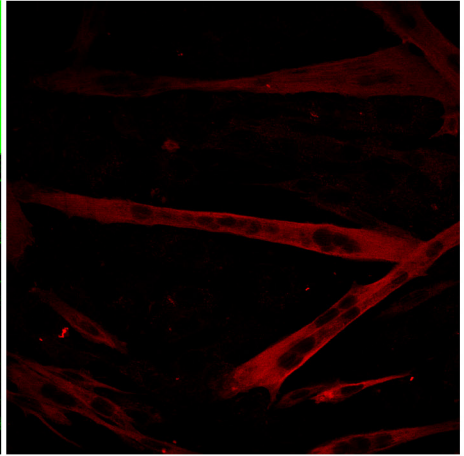

anti-p75

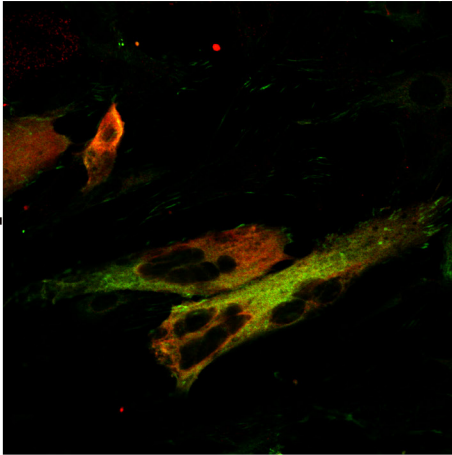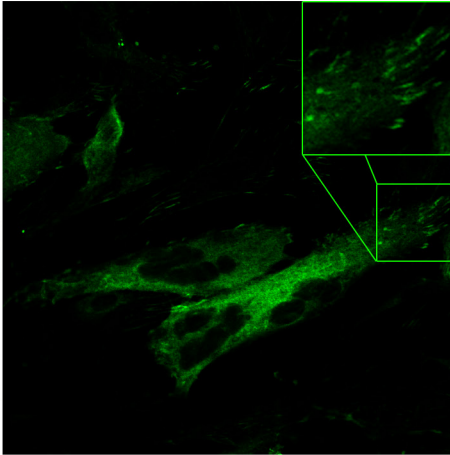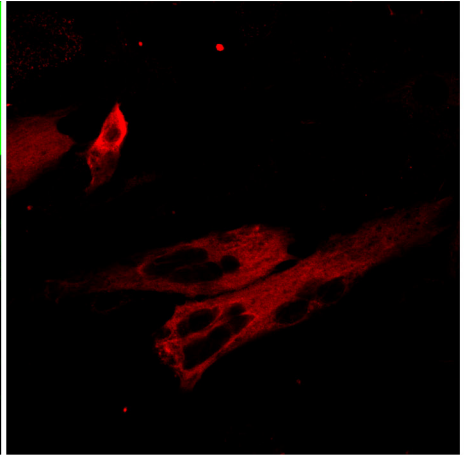

peptide

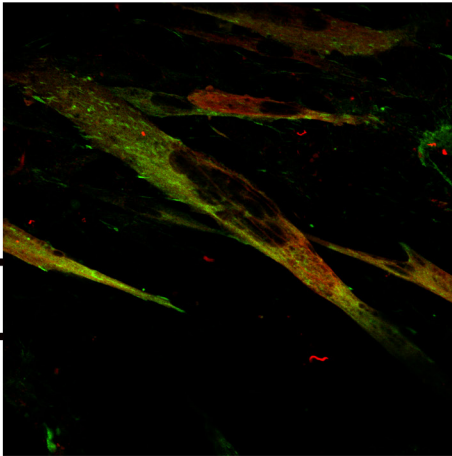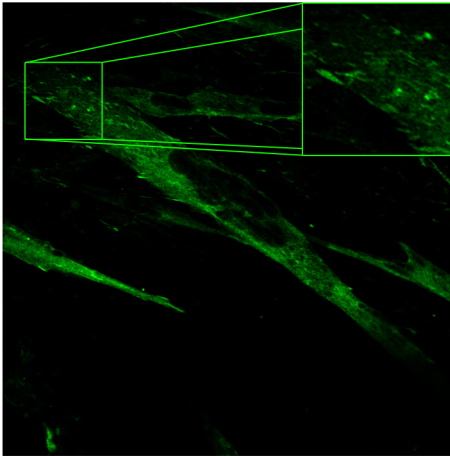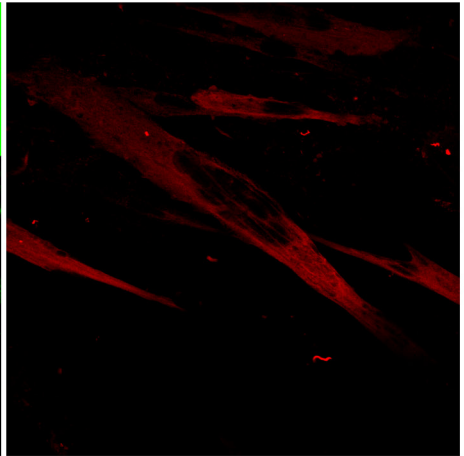

LPA

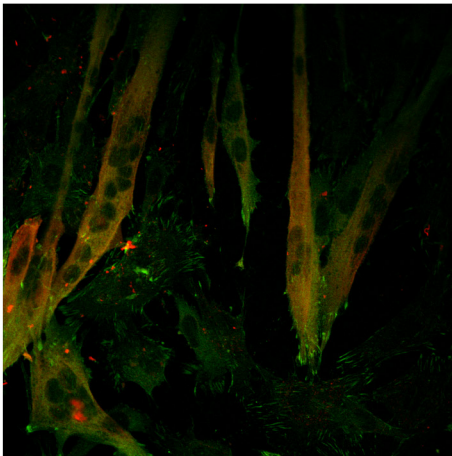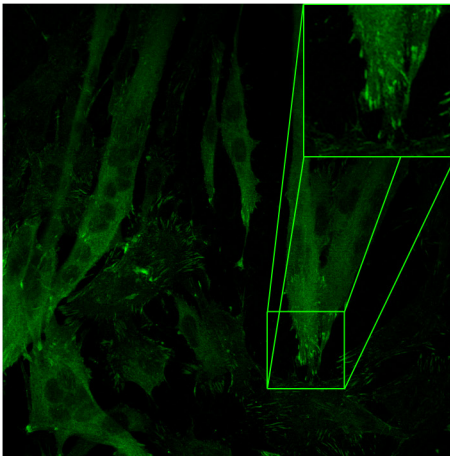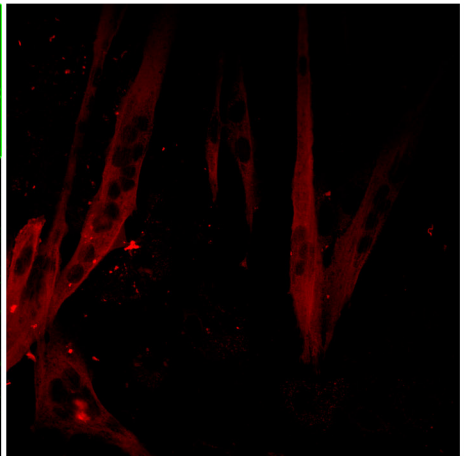

# Supplementary Figure 4

FAK

NT

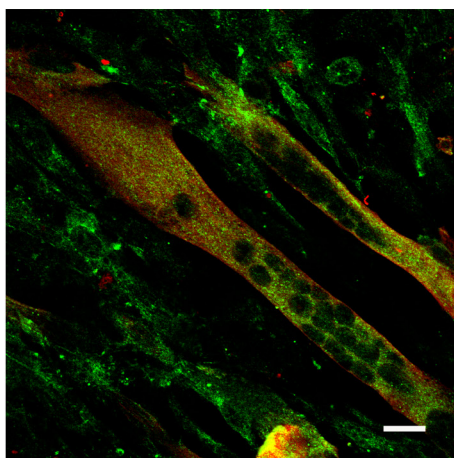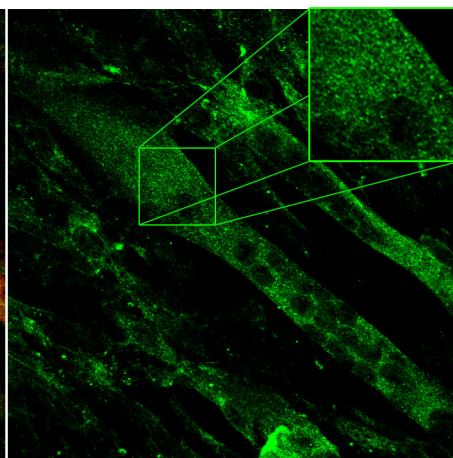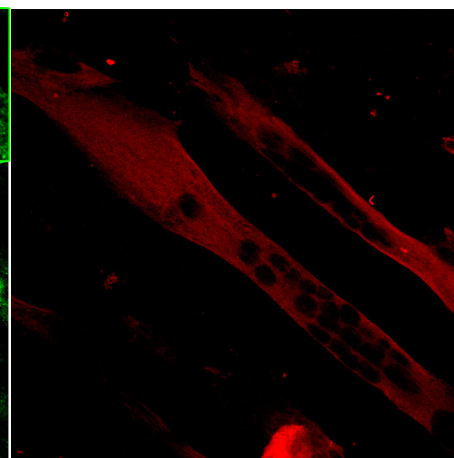

anti-p75

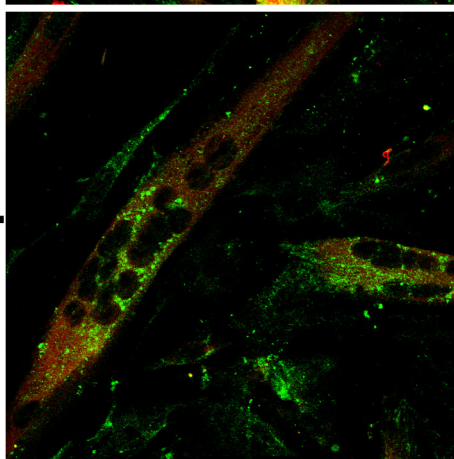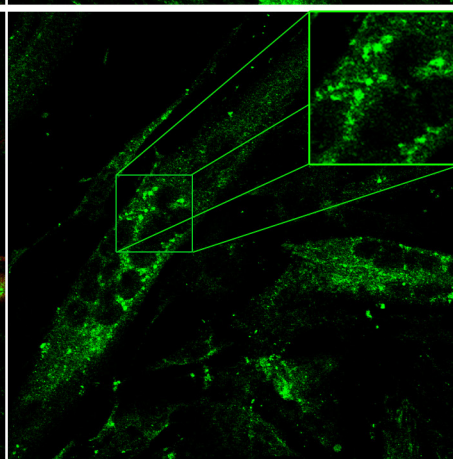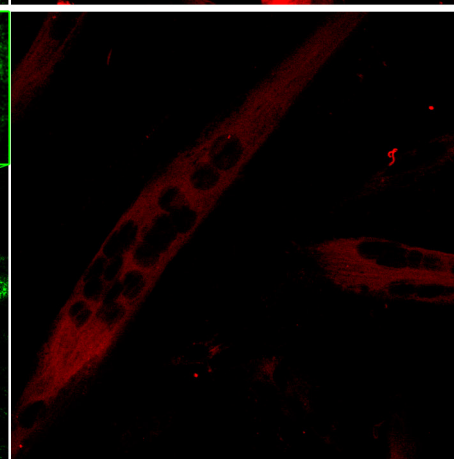

peptide

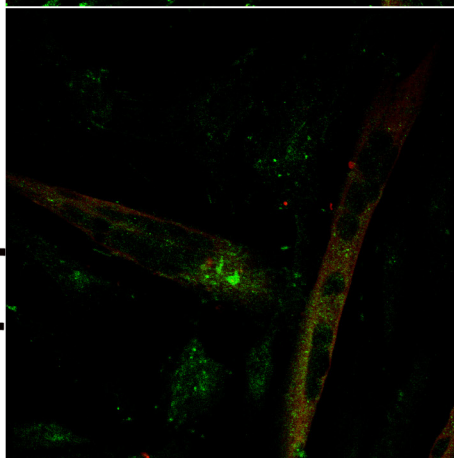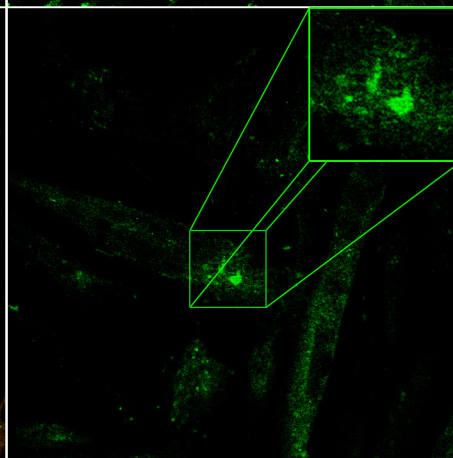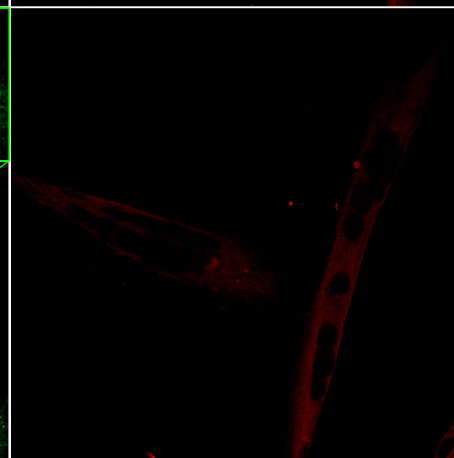

LPA

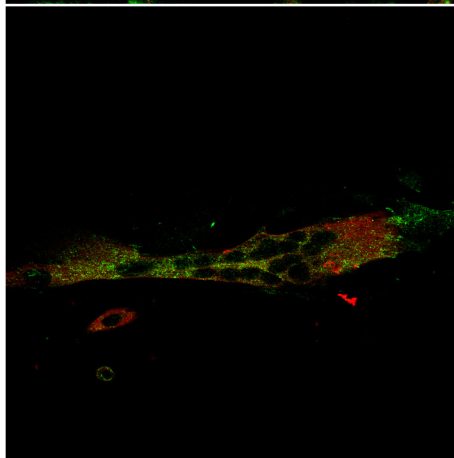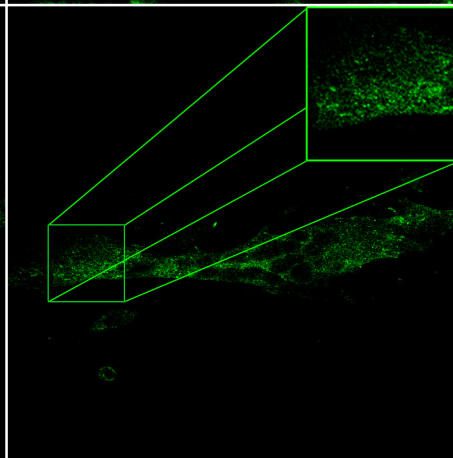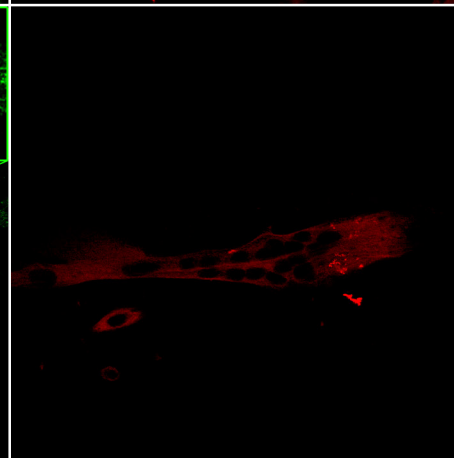

# Supplementary Figure 5

**A**

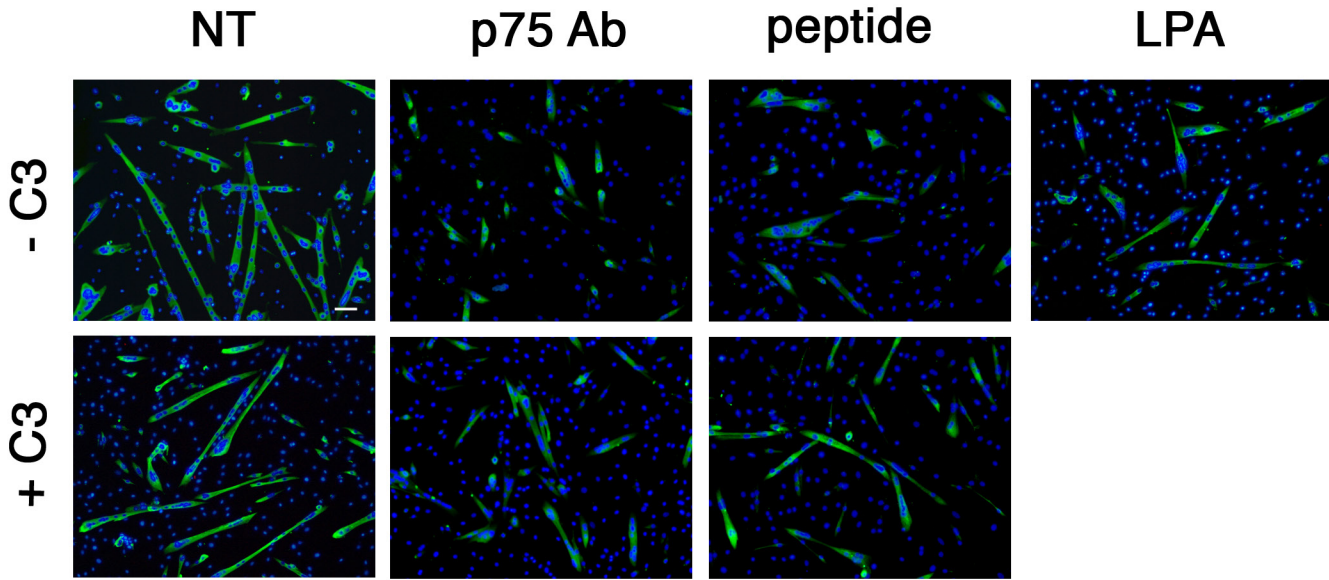

**B**

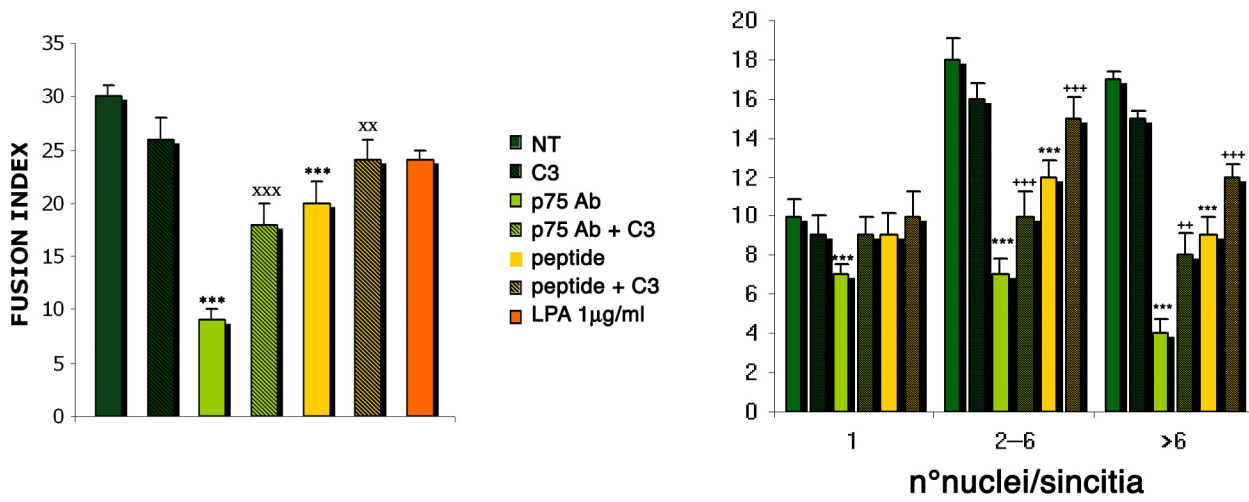

**C**

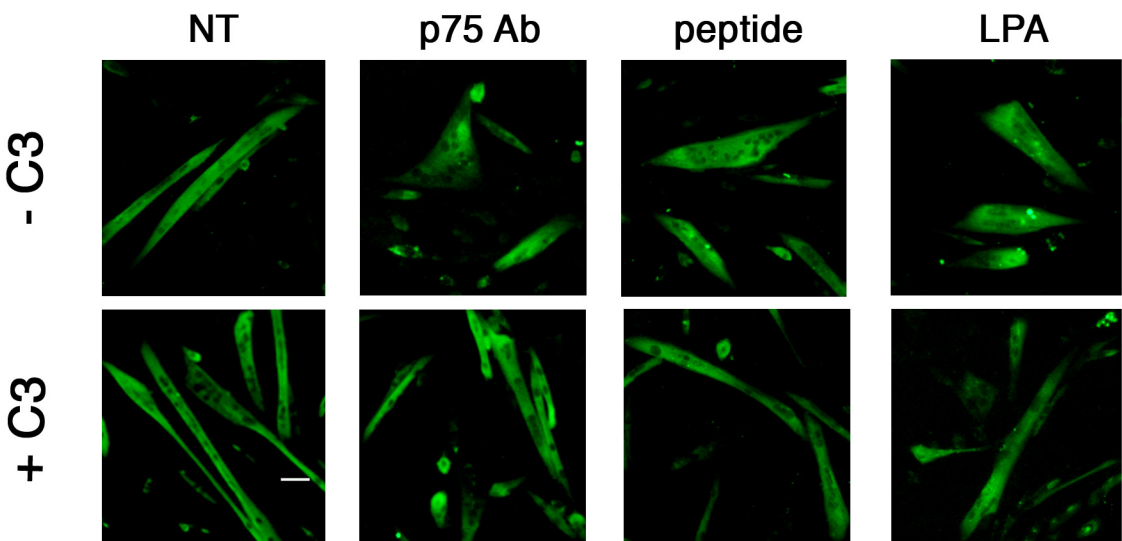



# Supplementary Figure 6

## A

mock

pRHOV14

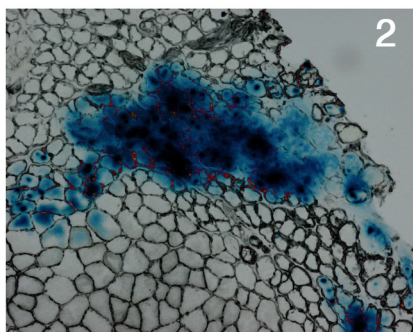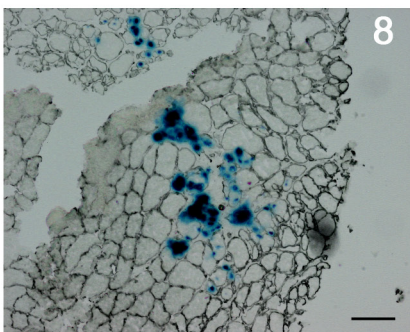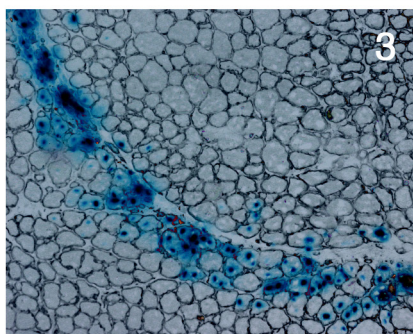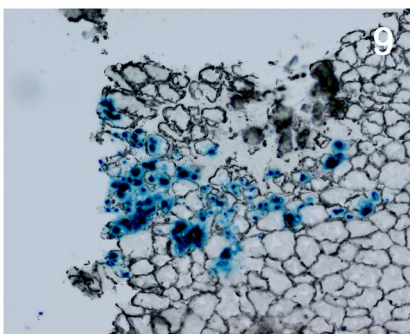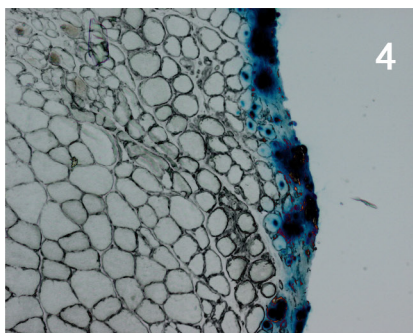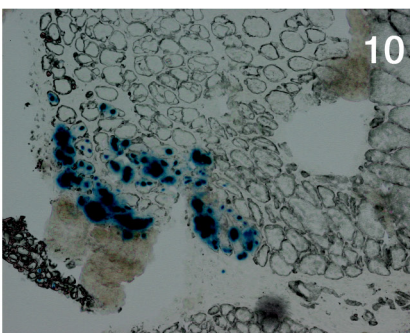

## B

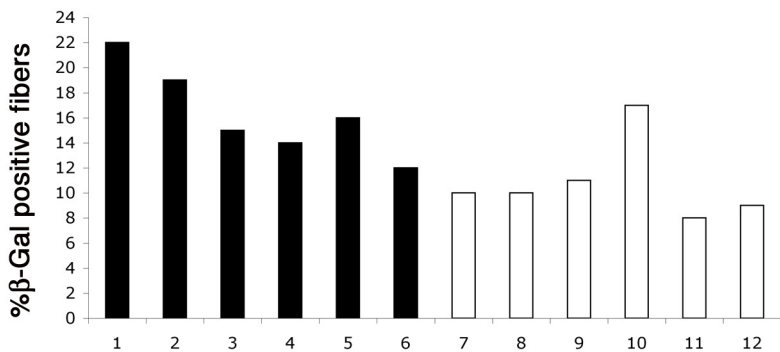

Supplement: E09-01-0012_1.pdf [file E09-01-0012_1.pdf]
